# Supplementary material for: Assessment of numerical schemes for transient, finite-element iceflow models using ISSM v4.18
Source: Copernicus journal article supplement (doi:10.5194/gmd-2020-397), 2020-12-17
Supplement: Supplementary file [file gmd-2020-397-AC1-supplement.zip]

## Updated plots of the “new version” of the manuscript

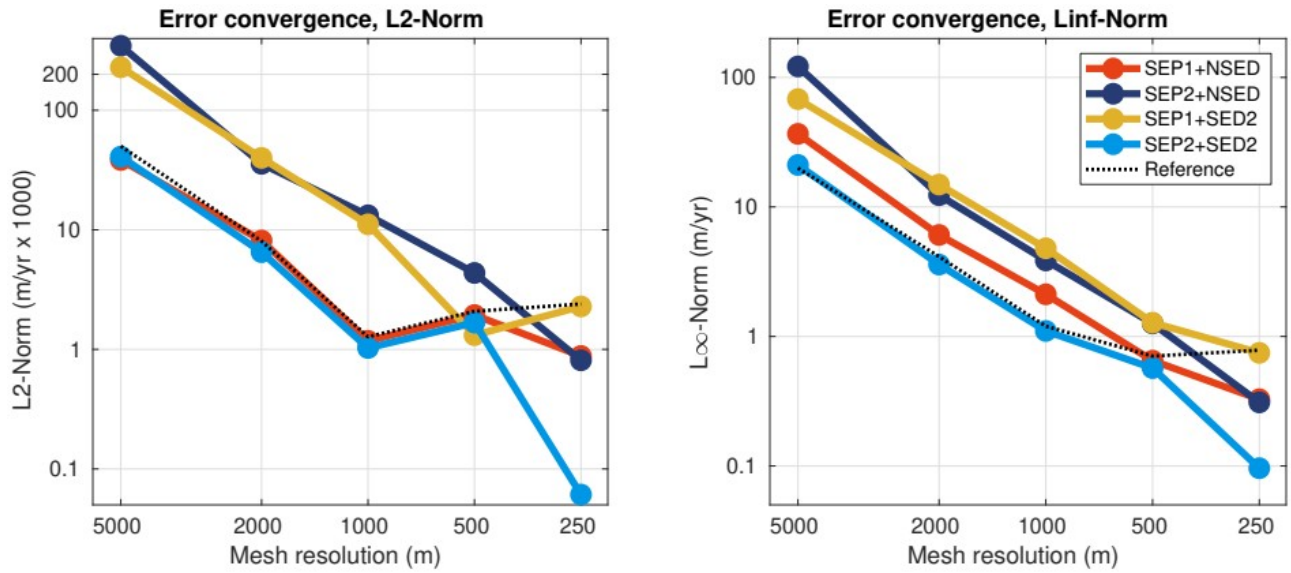

**Figure 3.** Error convergence of the ice speed for the diagnostic analysis in L2-norm (left panel) and Linf-norm (right panel). All sets of sub-element parameterizations are shown: SEP1+NSED, SEP2+NSED, SEP1+SED2, and SEP2+SED2. The error convergence from structured-conforming-mesh-based models is also shown (Reference, dotted line).

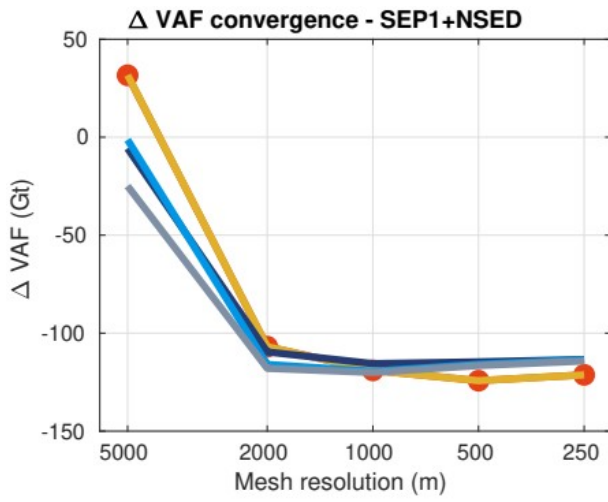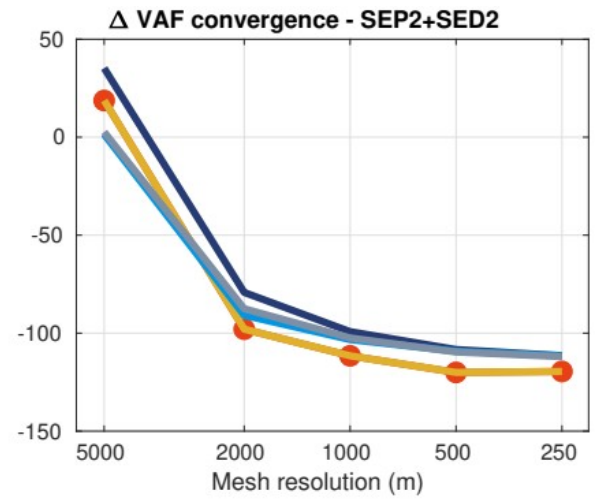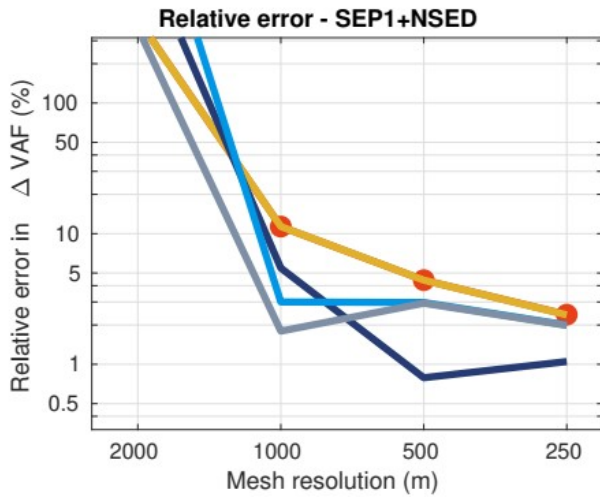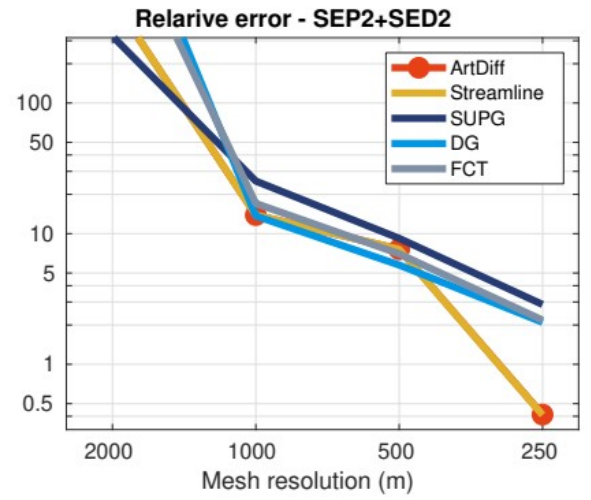

**Figure 6.** No external forcing experiment: convergence of volume above floatation change (DeltaVAF) at the end of the experiment ( $t=100$  yr) for different stabilization schemes (see legend). Two sets of parameterizations are employed: SEP1+NSED (left panels) and SEP2+SED2 (right panels). The relative errors are computed using Eq. 45.

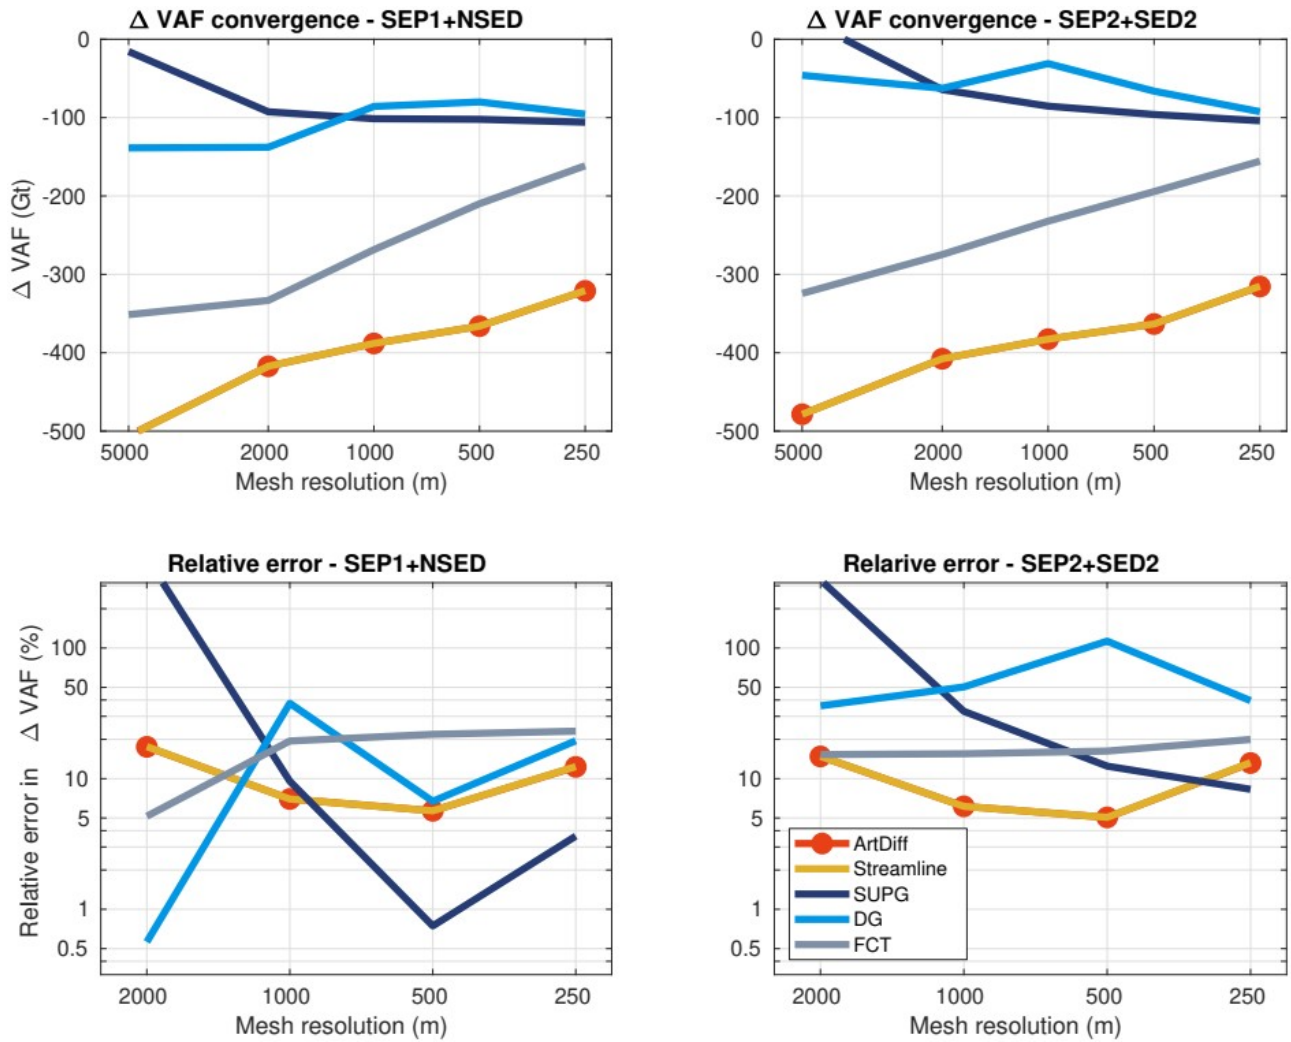

**Figure 8.** Basal melt experiment (no melt on partly floating elements): convergence of volume above floatation change ( $\Delta VAF$ ) at the end of the experiment ( $t=100$  yr) for different stabilization schemes (see legend). Two sets of sub-element parameterizations are employed: SEP1+NSED (left panels) and SEP2+SED2 (right panels). The relative errors are computed using Eq. 45.

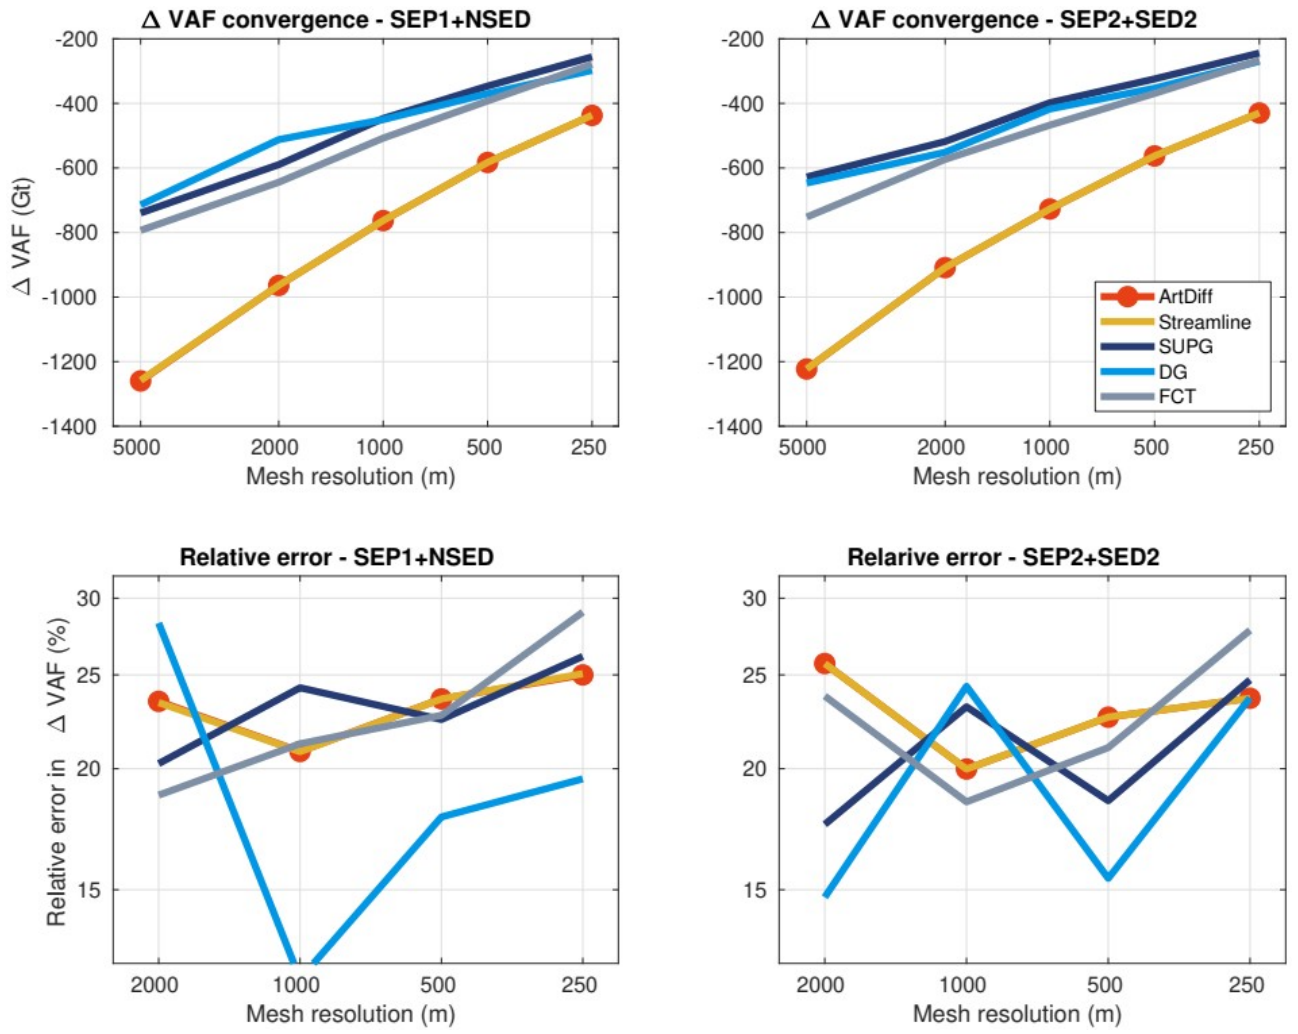

**Figure 11.** Basal melt experiment (melt on partly floating elements): convergence of volume above floatation change ( $\Delta VAF$ ) at the end of the experiment ( $t=100$  yr) for different stabilization schemes (see legend). Two sets of sub-element parameterizations are employed: SEP1+NSED (left panels) and SEP2+SED2 (right panels). The relative errors are computed using Eq. 45.

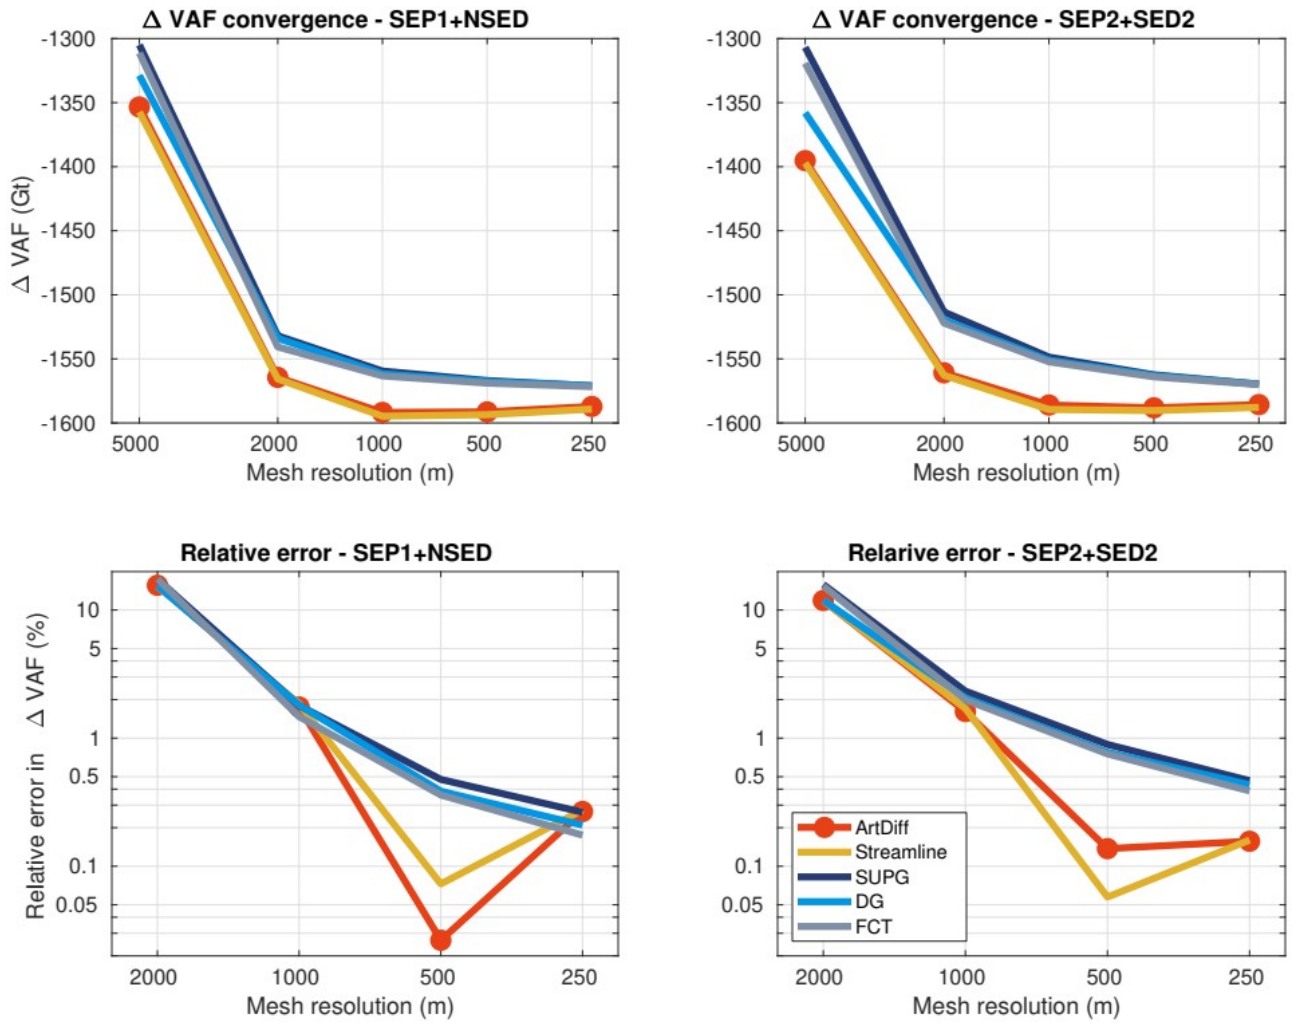

**Figure 13.** Basal friction perturbation experiment: convergence of volume above floatation change ( $\Delta VAF$ ) at the end of the experiment ( $t=100$  yr) for different stabilization schemes (see legend). Two sets of sub-element parameterizations are employed: SEP1+NSED (left panels) and SEP2+SED2 (right panels). The relative errors are computed using Eq. 45.

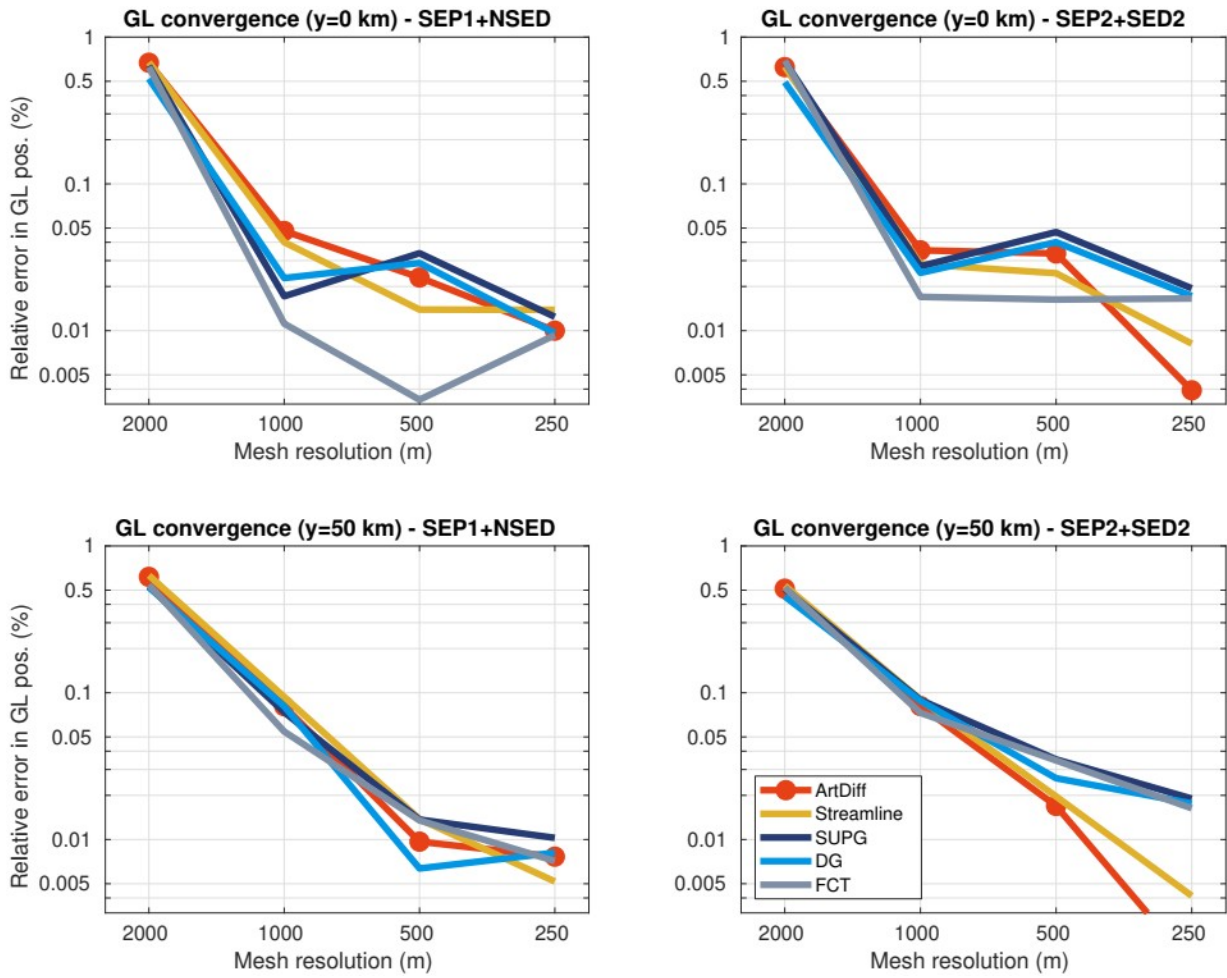

**Figure 15.** Basal friction perturbation experiment: convergence of grounding line positions (relative errors) at the end of the experiment ( $t=100$  yr), for  $y=0$  (top panels) and  $y=50$  km (bottom panels), and for different stabilization schemes (see legend). Two sets of sub-element parameterizations are employed: SEP1+NSED (left panels) and SEP2+SED2 (right panels). The relative errors are computed using Eq. 45 and replacing DeltaVAF by the grounding line position.



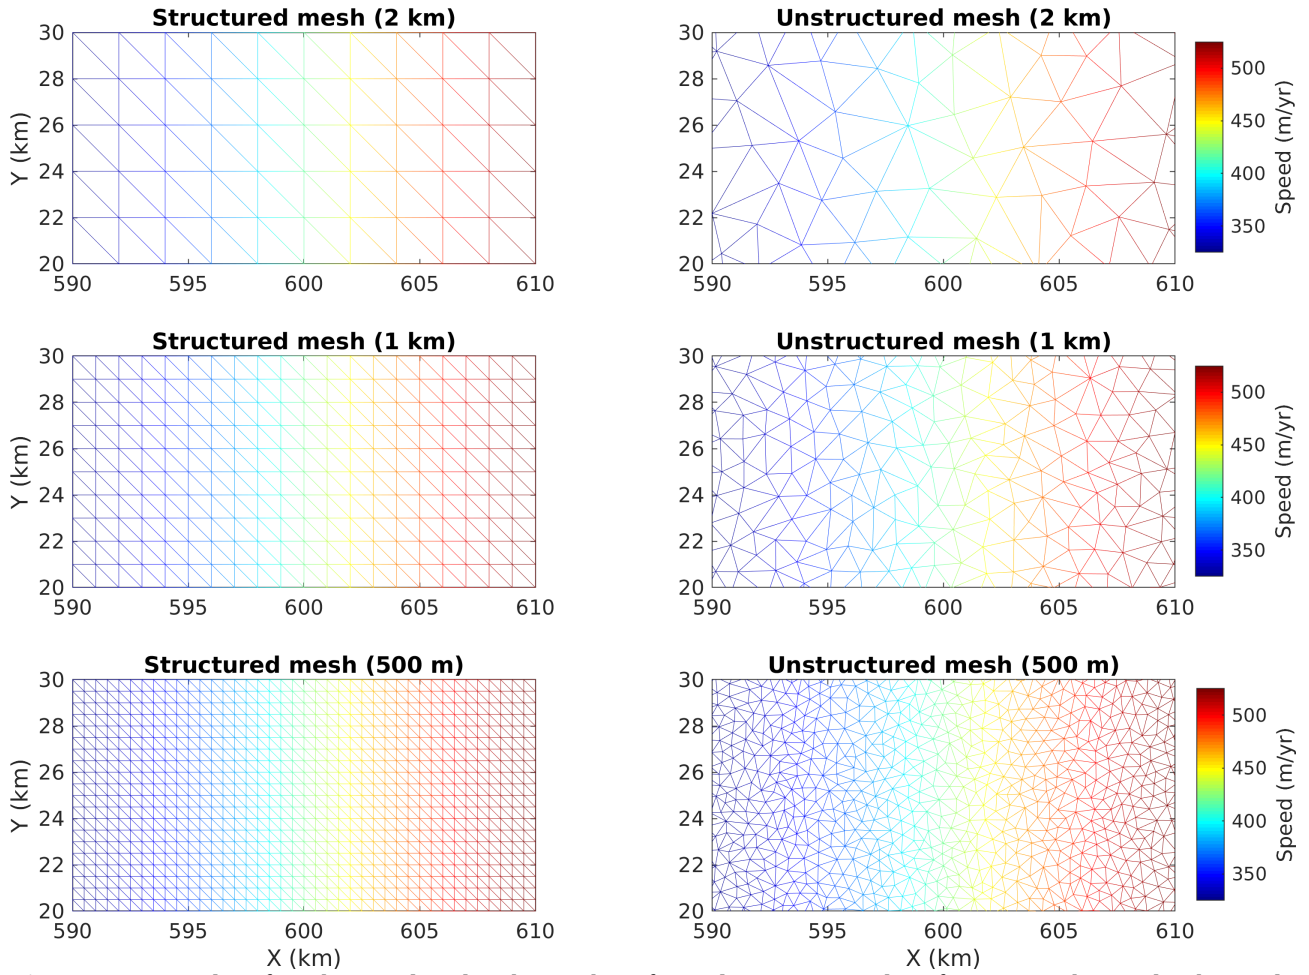

**Figure B1.** Examples of meshes employed in this work. Left panels are structured conforming meshes, and right panels the unstructured meshes. Three mesh resolutions are shown: 2, 1, and 0.5 km. The colormaps are the ice speeds obtained in the diagnostic analysis (Sec. 5,1) considering the grounding line at  $x=600$  km. Note that the structured meshes are conforming to the grounding line, i.e., they are generated such that the elements' edges match the grounding line position (in this case,  $x_{gl}=600$  km). Sub-element parameterizations SEP1+NSD are employed in the unstructured meshes to computed the ice speeds presented here.
